# Supplementary material for: Antimicrobial efficacy of sodium hypochlorite and hyper-pure chlorine dioxide in the depth of dentin tubules in vitro
Source: PubMed Central journal article supplement (PMC10680282; doi:10.1186/s12903-023-03685-6), 2023-11-27
Supplement: 12903_2023_3685_MOESM1_ESM.pdf [file 12903_2023_3685_MOESM1_ESM.pdf]

## **Appendix**

see in first paragraph of Discussion

**Appendix Table 1** *Study details from the literature using viability staining of bacteria in dentin tubules of root by CLSM method compared to our investigation [28, 31, 32, 44-46]. Ag np: silver nanoparticles, DW: distilled water, PIPS: photoninduced photoacoustic streaming, US: ultrasonic bath.*

| Author                 | Type of tooth                 | Sterilization of tooth before inoculation                                                                                                                                                                               | Sample type                     | Root canal enlargement | Method of inoculation                                                                                                                                                                                                                                                  | Steps of study                                                                  | No. of specimens in each group | Treatment method                                                                                      | Study groups                                                                                                                                     | Staining protocol                                                                                       | Wavelengths of emission                                                            | Magnification | Root segment scanned    | Measured parameter                                                                                                                                    | Depth of penetration  |
|------------------------|-------------------------------|-------------------------------------------------------------------------------------------------------------------------------------------------------------------------------------------------------------------------|---------------------------------|------------------------|------------------------------------------------------------------------------------------------------------------------------------------------------------------------------------------------------------------------------------------------------------------------|---------------------------------------------------------------------------------|--------------------------------|-------------------------------------------------------------------------------------------------------|--------------------------------------------------------------------------------------------------------------------------------------------------|---------------------------------------------------------------------------------------------------------|------------------------------------------------------------------------------------|---------------|-------------------------|-------------------------------------------------------------------------------------------------------------------------------------------------------|-----------------------|
| Ma et al., 2011        | not known single rooted       | 0.01% NaOCl hrs. not given<br>preparation of root block<br>enlargement of root canal<br>US bath:<br>5.25% NaOCl 4 min.<br>6% citric acid 4 min.                                                                         | 4mm block (apex removed)        | #6 Gates/Glidden       | 1 <sup>st</sup> day centrifugation of inoculum, incubation<br>2 <sup>nd</sup> day CLSM                                                                                                                                                                                 | 1. splitting sample<br>2. inoculation<br>3. treatment<br>4. staining            | n=2                            | drop of disinfectant on inner surface of split sample                                                 | 1% NaOCl 1 min<br>1% NaOCl 3 min<br>2% NaOCl 1 min<br>2% NaOCl 3 min<br>6% NaOCl 1 min<br>6% NaOCl 3 min<br>CHX 1 min<br>CHX 3 min<br>Qmix 1 min | LIVE/DEAD BacLight viability staining according to manufacturer's instructions<br>µL and min. not given | 500 nm SYTO9<br>635 nm PI                                                          | 20x           | coronal                 | volume of percentage of red fluorescence in three-dimensional model of scanned area                                                                   | measured until 500 µm |
| Andrade et al., 2015   | bovine                        | 1% NaOCl 48hrs.<br>preparation of root block<br>enlargement of root canal<br>17% EDTA 5 min. in root canal<br>nail polish on outer surface<br>autoclave 121°C, min. not given                                           | 12mm block (apical 5mm removed) | #120 Kerr-file         | 1 <sup>st</sup> day centrifugation of inoculum, incubation<br>2 <sup>nd</sup> day centrifugation of BHI, incubation<br>3 <sup>rd</sup> day centrifugation of inoculum, incubation<br>4 <sup>th</sup> day centrifugation of BHI, incubation<br>5 <sup>th</sup> day CLSM | 1. inoculation<br>2. cutting sample<br>3. staining<br>no treatment, methodology | n=5                            | NA                                                                                                    | NA                                                                                                                                               | 17% EDTA 10 min.<br>LIVE/DEAD BacLight viability staining:<br>30 µL 20 min.                             | not given                                                                          | 40x           | coronal, middle         | volume of green and red fluorescence in three-dimensional model of scanned area                                                                       | not measured          |
| Azim et al., 2016      | human mandibular premolar     | enlargement of root canal<br>autoclave 121°C, 20 min.                                                                                                                                                                   | size of root not given          | #25/04 EndoSeq         | Ma et al. 2011 protocol                                                                                                                                                                                                                                                | 1. inoculation<br>2. treatment<br>3. splitting sample<br>4. staining            | n=4                            | irrigation or root canal with<br>2 mL 17% EDTA 1 min<br>and<br>3 mL 6% NaOCl 2 min<br>with activation | activation methods:<br>PIPS<br>hand<br>US<br>XP Endo                                                                                             | LIVE/DEAD BacLight viability staining according to manufacturer's instructions<br>15 µL, min. not given | 500 nm SYTO9<br>635 nm PI                                                          | 20x           | coronal, middle, apical | percentage of red fluorescence in distances:<br>50 µm, 100 µm, 150 µm                                                                                 | measured until 150 µm |
| Cavenago et al., 2017  | bovine single rooted          | preparation of root block<br>enlargement of root canal<br>immerse:<br>2.5% NaOCl 5 min.,<br>17% EDTA 5 min.,<br>nail polish on outer surface<br>autoclave 121°C, min. not given                                         | 3mm block (apex removed)        | #120 Kerr-file         | Andrade et al. 2015 protocol                                                                                                                                                                                                                                           | 1. inoculation<br>2. treatment<br>3. cutting sample<br>4. staining              | not well defined               | root canal filled with test material                                                                  | MTA + DW<br>MTA + propylene glycol<br>MTA + Arcetcum lappa L.<br>MTA + Casearia sylvestris                                                       | 17% EDTA 5 min.<br>LIVE/DEAD BacLight viability staining:<br>30 µL 10 min.                              | not given                                                                          | 40x           | apical                  | percentage of green and red fluorescence in scanned area                                                                                              | not measured          |
| Rodrigues et al., 2018 | bovine single rooted          | 1% NaOCl 48 hrs.<br>preparation of root block<br>enlargement of root canal<br>US bath:<br>1% NaOCl 10 min.,<br>17% EDTA 10 min.,<br>nail polish on outer surface<br>autoclave 121°C, min. not given                     | 12mm block (apical 5mm removed) | #120 Kerr-file         | Andrade et al. 2015 protocol                                                                                                                                                                                                                                           | 1. inoculation<br>2. treatment<br>3. splitting sample<br>4. staining            | n=8                            | irrigation of root canal with disinfectant                                                            | 1 mL .5% NaOCl +<br>Na thiosulphate<br>1 mL CHX<br>1 mL Ag np                                                                                    | 17% EDTA 5 min.<br>LIVE/DEAD BacLight viability staining:<br>30 µL 20 min.                              | 490-575 nm SYTO9<br>600-720 nm PI                                                  | 40x           | coronal, middle         | percentage of green fluorescence in scanned area                                                                                                      | not measured          |
| Giardino et al., 2019  | human single rooted           | preparation of root block<br>enlargement of root canal<br>US bath:<br>5% NaOCl 5 min.,<br>17% EDTA 5 min.,<br>nail polish on outer surface<br>autoclave 121°C, min. not given                                           | 8mm block (apical 5 mm removed) | #30 Protaper Next      | Andrade et al. 2015 protocol                                                                                                                                                                                                                                           | 1. inoculation<br>2. treatment<br>3. cutting sample<br>4. staining              | n=10                           | irrigation of root canal with disinfectant                                                            | 5ml 5% NaOCl 5 min +<br>2ml 17% EDTA 2 min<br>5ml 5% NaOCl +<br>DualRinse HEDP 5 min                                                             | LIVE/DEAD BacLight viability staining:<br>30 µL 20 min.                                                 | 490-575 nm SYTO9<br>600-720 nm PI                                                  | 40x           | coronal, middle         | percentage of green fluorescence in scanned area                                                                                                      | not measured          |
| This study             | human mandibular molar D root | 1% NaOCl 48 hrs.<br>length of root adjusted<br>remove outer cementum<br>enlargement of root canal<br>17% EDTA 1 min. in root canal,<br>activation by EDDY system<br>immerse: 17% EDTA 5 min.<br>autoclave 121°C 20 min. | 11mm root w/ apex               | #40 Reciproc Blue      | Andrade et al. 2015 protocol                                                                                                                                                                                                                                           | 1. inoculation<br>2. treatment<br>3. splitting sample<br>4. staining            | n=7                            | irrigation of root canal with disinfectant                                                            | 4 mL saline 10 min<br>4 mL 5% NaOCl 10 min<br>4 mL 0.12% ClO <sub>2</sub> 10 min                                                                 | Andrade et al. protocol                                                                                 | based on personal communication with Andrade:<br>500-590 nm SYTO9<br>560-680 nm PI | 10x           | coronal                 | percentage of red fluorescence in distances:50-150 µm, 150-250 µm, 250-350 µm, 350-450 µm, 450-550 µm, 550-650 µm, 650-750 µm, 750-850 µm, 850-950 µm | measured until 950 µm |
